# Supplementary material
Source: PubMed Central journal article supplement (PMC2703511)

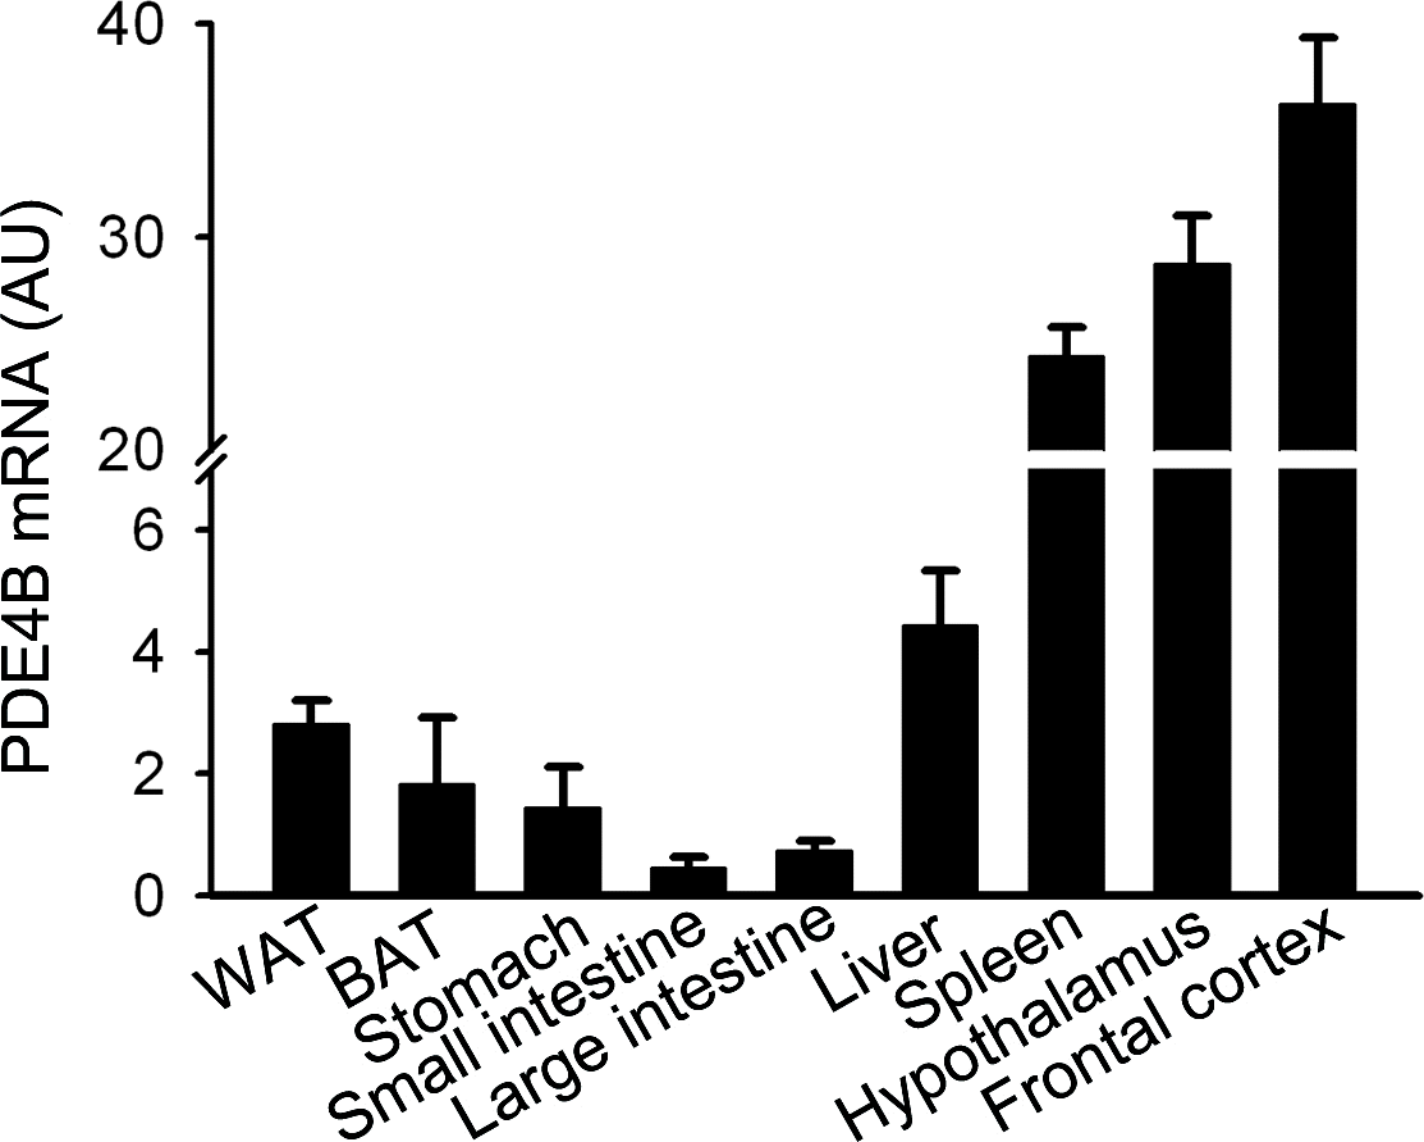

Supplement: en.2009-0108_1.pdf [file en.2009-0108_1.pdf]
